# Supplementary material for: Targeting STAT5 or STAT5-Regulated Pathways Suppresses Leukemogenesis of Ph+ Acute Lymphoblastic Leukemia
Source: Oxford University Press journal article supplement (doi:10.1158/0008-5472.can-18-0195), 2018-08-28
Supplement: 00085472can180195-sup-195822_2_supp_4972179_pdmgcx.docx [file 00085472can180195-sup-195822_2_supp_4972179_pdmgcx.docx]

**Supplementary Table S2. Primary human Ph-like sample**

BM: bone marrow

| **ID sample** | **Age** | **Source** | **New or**  **relapse** | **Cytogenetics** |
| --- | --- | --- | --- | --- |
| ALL #005-2018 | 50 | BM | New | IGH/CRLF2 translocation 81.5% Positive for rearrangement of IGH along with extra copies of 5’ (distal) end; 65% Positive for rearrangement of CRLF2 along with extra copies of 5’ (proximal) end;  7% Positive for rearrangement of CRLF2; 80% Positive for three copies of RUNX1; Negative for translocation BCR-ABL1 |
